# Supplementary material for: Patient-Reported Symptoms Over 48 Weeks Among Participants in Randomized, Double-Blind, Phase III Non-inferiority Trials of Adults with HIV on Co-formulated Bictegravir, Emtricitabine, and Tenofovir Alafenamide versus Co-formulated Abacavir, Dolutegravir, and Lamivudine
Source: PubMed Central journal article supplement — Patient. 2018 Jun 29;11(5):561–73. doi: 10.1007/s40271-018-0322-8 (PMC6132439; doi:10.1007/s40271-018-0322-8), 2018-06-29
Supplement: 40271_2018_322_MOESM1_ESM.pdf [file 40271_2018_322_MOESM1_ESM.pdf]

**The Patient: Patient-Centered Outcomes Research**

**Electronic Supplementary Materials for:**

**Patient-Reported Symptoms Over 48 Weeks Among Participants in Randomized, Double-Blind, Phase 3 Non-Inferiority Trials of Adults with HIV on Coformulated Bictegravir, Emtricitabine, and Tenofovir Alafenamide versus Coformulated Abacavir, Dolutegravir, and Lamivudine**

David Wohl, MD<sup>1</sup>; Amanda Clarke, MD<sup>2</sup>; Franco Maggiolo, MD<sup>3</sup>; Will Garner, PhD<sup>4</sup>;  
Marianne Laouri, PhD<sup>4</sup>; Hal Martin, MD<sup>4</sup>; Erin Quirk, MD<sup>4</sup>

<sup>1</sup> University of North Carolina at Chapel Hill, Chapel Hill, NC, USA; <sup>2</sup> Royal Sussex County Hospital, Brighton, UK; <sup>3</sup> ASST Papa Giovanni XXIII, Bergamo, IT; <sup>4</sup>Gilead Sciences, Inc., Foster City, CA, USA

**Corresponding Author:**

Will Garner, PhD

Gilead Sciences, Inc.

Email: will.garner@gilead.com

**Electronic Supplementary Materials Table 1a: Unadjusted and Adjusted Associations between Treatment and Bothersome Symptoms at Weeks 4, 12 and 48 in Study GS-US-380-1489 (Treatment-Naïve)**

| Symptom Description<br>OR (95% CI), p-value | Week 4                  |                                          | Week 12                 |                                            | Week 48                 |                                            |
|---------------------------------------------|-------------------------|------------------------------------------|-------------------------|--------------------------------------------|-------------------------|--------------------------------------------|
|                                             | Unadjusted              | Adjusted                                 | Unadjusted              | Adjusted                                   | Unadjusted              | Adjusted                                   |
| <b>Fatigue/loss of energy</b>               | 0.68 (0.49-0.94), 0.018 | 0.58 (0.40-0.84), 0.004 <sup>a,f,g</sup> | 0.70 (0.51-0.98), 0.036 | 0.62 (0.43-0.89), 0.010 <sup>a,f,g</sup>   | 0.69 (0.49-0.96), 0.030 | 0.57 (0.39-0.85), 0.005 <sup>a,b,f,g</sup> |
| Fevers/chills/sweats                        | 1.12 (0.75-1.66), 0.58  | 1.03 (0.67-1.60), 0.89 <sup>a</sup>      | 0.89 (0.57-1.38), 0.59  | 0.81 (0.50-1.31), 0.39 <sup>a</sup>        | 1.05 (0.67-1.64), 0.84  | 1.10 (0.68-1.80), 0.69 <sup>a,e,f</sup>    |
| <b>Dizzy/lightheadedness</b>                | 0.69 (0.47-1.02), 0.066 | 0.59 (0.39-0.91), 0.016 <sup>a</sup>     | 0.83 (0.54-1.27), 0.38  | 0.74 (0.46-1.17), 0.20 <sup>a,g</sup>      | 0.54 (0.35-0.84), 0.006 | 0.47 (0.29-0.77), 0.003 <sup>a,f,g</sup>   |
| Pain/numbness/tingling in hands/feet        | 0.86 (0.56-1.32), 0.49  | 0.82 (0.50-1.32), 0.41 <sup>a,f</sup>    | 0.92 (0.60-1.41), 0.71  | 0.85 (0.53-1.35), 0.49 <sup>a,f</sup>      | 0.97 (0.64-1.46), 0.88  | 0.95 (0.60-1.50), 0.83 <sup>a,f</sup>      |
| Trouble remembering                         | 1.07 (0.72-1.59), 0.73  | 0.95 (0.60-1.50), 0.82 <sup>a,e,g</sup>  | 1.22 (0.83-1.78), 0.31  | 1.19 (0.77-1.84), 0.43 <sup>a,f,g</sup>    | 0.96 (0.65-1.43), 0.84  | 0.89 (0.57-1.40), 0.62 <sup>a,f</sup>      |
| <b>Nausea/vomiting</b>                      | 0.51 (0.34-0.77), 0.001 | 0.47 (0.30-0.73), <0.001 <sup>b</sup>    | 0.44 (0.26-0.74), 0.002 | 0.39 (0.23-0.68), <0.001 <sup>g</sup>      | 0.75 (0.44-1.26), 0.27  | 0.70 (0.40-1.23), 0.21 <sup>a,b,f</sup>    |
| Diarrhea/loose bowels                       | 0.97 (0.66-1.42), 0.87  | 0.90 (0.59-1.36), 0.60 <sup>a,e</sup>    | 0.80 (0.53-1.22), 0.30  | 0.78 (0.51-1.21), 0.27 <sup>a,f</sup>      | 0.76 (0.47-1.23), 0.26  | 0.69 (0.41-1.17), 0.17 <sup>a,e,f</sup>    |
| Sad/down/depressed                          | 0.85 (0.61-1.19), 0.35  | 0.69 (0.45-1.06), 0.086 <sup>a,g</sup>   | 1.04 (0.74-1.46), 0.82  | 0.96 (0.64-1.43), 0.83 <sup>a,e,g</sup>    | 0.84 (0.59-1.19), 0.33  | 0.72 (0.47-1.09), 0.12 <sup>a,e,g</sup>    |
| Nervous/anxious                             | 0.96 (0.68-1.34), 0.80  | 0.80 (0.52-1.22), 0.30 <sup>a,e,g</sup>  | 0.89 (0.63-1.27), 0.53  | 0.79 (0.53-1.18), 0.25 <sup>a,e,g</sup>    | 0.93 (0.66-1.33), 0.70  | 0.85 (0.56-1.28), 0.43 <sup>a,d,e,g</sup>  |
| <b>Difficulty sleeping</b>                  | 0.88 (0.63-1.22), 0.45  | 0.79 (0.54-1.17), 0.24 <sup>a,e,f</sup>  | 0.66 (0.47-0.93), 0.017 | 0.58 (0.40-0.85), 0.005 <sup>a,c,d,f</sup> | 0.73 (0.52-1.03), 0.075 | 0.64 (0.44-0.94), 0.022 <sup>a,b,g</sup>   |
| Skin problems/rash/itching                  | 0.80 (0.55-1.16), 0.23  | 0.68 (0.45-1.03), 0.070 <sup>a</sup>     | 0.84 (0.57-1.25), 0.40  | 0.78 (0.51-1.18), 0.24 <sup>a,f</sup>      | 0.92 (0.62-1.37), 0.69  | 0.91 (0.60-1.38), 0.65 <sup>a,f</sup>      |
| Coughing/trouble breathing                  | 0.96 (0.60-1.51), 0.84  | 0.92 (0.55-1.53), 0.75 <sup>a,f</sup>    | 1.04 (0.66-1.64), 0.87  | 1.08 (0.66-1.77), 0.75 <sup>a,f</sup>      | 0.88 (0.55-1.42), 0.61  | 0.83 (0.49-1.41), 0.49 <sup>a,f,g</sup>    |
| <b>Headaches</b>                            | 0.89 (0.61-1.31), 0.55  | 0.86 (0.57-1.29), 0.47 <sup>a,d</sup>    | 0.86 (0.58-1.28), 0.45  | 0.80 (0.52-1.24), 0.32 <sup>a,b,c</sup>    | 0.50 (0.33-0.78), 0.002 | 0.46 (0.29-0.73), 0.001 <sup>a</sup>       |
| <b>Loss of appetite</b>                     | 0.78 (0.50-1.22), 0.27  | 0.67 (0.39-1.14), 0.14 <sup>a,b,f</sup>  | 0.53 (0.33-0.84), 0.007 | 0.43 (0.25-0.72), 0.002 <sup>a,b,f</sup>   | 0.72 (0.43-1.21), 0.22  | 0.61 (0.33-1.10), 0.10 <sup>a,b,f</sup>    |
| <b>Bloating/pain/gas in stomach</b>         | 1.00 (0.69-1.44), 0.98  | 0.95 (0.63-1.42), 0.81 <sup>a,b,f</sup>  | 0.90 (0.61-1.33), 0.60  | 0.86 (0.57-1.30), 0.48 <sup>a</sup>        | 0.67 (0.45-1.00), 0.048 | 0.61 (0.40-0.93), 0.022 <sup>a,f</sup>     |
| Muscle aches/joint pain                     | 0.89 (0.60-1.31), 0.55  | 0.88 (0.56-1.39), 0.59 <sup>a,c,f</sup>  | 1.07 (0.74-1.57), 0.71  | 1.08 (0.71-1.64), 0.73 <sup>a,b,f,g</sup>  | 0.82 (0.56-1.20), 0.30  | 0.80 (0.52-1.24), 0.31 <sup>a,b,c,f</sup>  |
| Problems with sex                           | 1.10 (0.73-1.66), 0.65  | 1.03 (0.66-1.62), 0.88 <sup>a,f,g</sup>  | 1.13 (0.74-1.72), 0.57  | 1.04 (0.66-1.62), 0.88 <sup>a,g</sup>      | 0.91 (0.60-1.39), 0.66  | 0.86 (0.55-1.37), 0.53 <sup>a,f,g</sup>    |
| Changes in body composition                 | 1.23 (0.77-1.95), 0.38  | 1.22 (0.74-2.02), 0.44 <sup>a,d,f</sup>  | 1.18 (0.77-1.81), 0.46  | 1.14 (0.73-1.80), 0.56 <sup>a</sup>        | 0.82 (0.55-1.21), 0.32  | 0.73 (0.47-1.12), 0.15 <sup>a,f</sup>      |
| <b>Weight loss/wasting</b>                  | 1.02 (0.60-1.75), 0.93  | 0.92 (0.51-1.67), 0.79 <sup>a,b,f</sup>  | 0.61 (0.35-1.06), 0.079 | 0.53 (0.29-0.97), 0.039 <sup>a</sup>       | 1.02 (0.61-1.69), 0.94  | 0.95 (0.55-1.66), 0.87 <sup>a,f</sup>      |
| Hair loss/changes                           | 0.69 (0.38-1.24), 0.21  | 0.52 (0.27-1.01), 0.053 <sup>a,b,d</sup> | 0.80 (0.44-1.46), 0.47  | 0.70 (0.37-1.34), 0.28 <sup>a,d</sup>      | 0.60 (0.32-1.15), 0.13  | 0.51 (0.25-1.04), 0.064 <sup>a,d</sup>     |

Adjusted logistic regression model includes treatment as the independent variable and the bothersome HIVSI item as the dependent variable, adjusted for Baseline HIVSI count, age, sex, Baseline VACS Index, serious mental illness, Baseline SF-36 PCS, and Baseline SF-36 MCS.

P-value is for treatment effect; bolding indicates significant treatment effect in one or more of the models.

The following covariates were statistically significant (p<0.05) in the model: <sup>a</sup>Baseline HIVSI count; <sup>b</sup>Age; <sup>c</sup>Sex; <sup>d</sup>Baseline VACS Index; <sup>e</sup>Serious mental illness; <sup>f</sup>Baseline SF-36 PCS; <sup>g</sup>Baseline SF-36 MCS.

An odds ratio (OR) < 1 represents less bothersome symptom for B/F/TAF

| <b>Electronic Supplementary Materials Table 1a-2: Bayesian information criterion (BIC) for Unadjusted and Adjusted Associations between Treatment and Bothersome Symptoms at Weeks 4, 12 and 48 in Study GS-US-380-1489 (Treatment-Naïve)</b> |                   |                 |             |                   |                 |             |                   |                 |             |
|-----------------------------------------------------------------------------------------------------------------------------------------------------------------------------------------------------------------------------------------------|-------------------|-----------------|-------------|-------------------|-----------------|-------------|-------------------|-----------------|-------------|
| <b>Symptom Description, BIC</b>                                                                                                                                                                                                               | <b>Week 4</b>     |                 |             | <b>Week 12</b>    |                 |             | <b>Week 48</b>    |                 |             |
|                                                                                                                                                                                                                                               | <b>Unadjusted</b> | <b>Adjusted</b> | <b>Diff</b> | <b>Unadjusted</b> | <b>Adjusted</b> | <b>Diff</b> | <b>Unadjusted</b> | <b>Adjusted</b> | <b>Diff</b> |
| Fatigue/loss of energy                                                                                                                                                                                                                        | 856.3             | 748.6           | 107.7       | 824.5             | 739.4           | 85.1        | 786.3             | 677.2           | 109.1       |
| Fevers/chills/sweats                                                                                                                                                                                                                          | 628.8             | 577.4           | 51.4        | 528.5             | 506.9           | 21.6        | 513.6             | 486.1           | 27.5        |
| Dizzy/lightheadedness                                                                                                                                                                                                                         | 642.3             | 617.1           | 25.2        | 557.8             | 538.3           | 19.5        | 548.4             | 509.1           | 39.3        |
| Pain/numbness/tingling in hands/feet                                                                                                                                                                                                          | 554.3             | 505             | 49.3        | 570.9             | 533.2           | 37.7        | 591.5             | 537.9           | 53.6        |
| Trouble remembering                                                                                                                                                                                                                           | 629               | 525             | 104         | 662.2             | 585             | 77.2        | 622.6             | 554.4           | 68.2        |
| Nausea/vomiting                                                                                                                                                                                                                               | 604.1             | 601.8           | 2.3         | 442.8             | 453.6           | -10.8       | 420.9             | 410.6           | 10.3        |
| Diarrhea/loose bowels                                                                                                                                                                                                                         | 653.7             | 620.5           | 33.2        | 577.5             | 587.7           | -10.2       | 472.4             | 449.1           | 23.3        |
| Sad/down/depressed                                                                                                                                                                                                                            | 808.3             | 589.3           | 219         | 792.3             | 644.8           | 147.5       | 727.5             | 612.9           | 114.6       |
| Nervous/anxious                                                                                                                                                                                                                               | 797.8             | 595.3           | 202.5       | 752.5             | 653.3           | 99.2        | 728.3             | 611.9           | 116.4       |
| Difficulty sleeping                                                                                                                                                                                                                           | 813.9             | 689.1           | 124.8       | 792.8             | 726.2           | 66.6        | 757.7             | 717.9           | 39.8        |
| Skin problems/rash/itching                                                                                                                                                                                                                    | 694.6             | 626.8           | 67.8        | 644.4             | 626.1           | 18.3        | 627.7             | 612.1           | 15.6        |
| Coughing/trouble breathing                                                                                                                                                                                                                    | 508.7             | 468.1           | 40.6        | 514.2             | 494.5           | 19.7        | 476.5             | 436.5           | 40          |
| Headaches                                                                                                                                                                                                                                     | 662.8             | 645.6           | 17.2        | 625               | 591.3           | 33.7        | 558.1             | 547.6           | 10.5        |
| Loss of appetite                                                                                                                                                                                                                              | 536.1             | 437.6           | 98.5        | 510.3             | 461.1           | 49.2        | 424.5             | 371.9           | 52.6        |
| Bloating/pain/gas in stomach                                                                                                                                                                                                                  | 700.7             | 648.8           | 51.9        | 647               | 637.7           | 9.3         | 628               | 612.1           | 15.9        |
| Muscle aches/joint pain                                                                                                                                                                                                                       | 636.2             | 553.2           | 83          | 674.4             | 616.8           | 57.6        | 652.5             | 573.9           | 78.6        |
| Problems with sex                                                                                                                                                                                                                             | 595.4             | 554.8           | 40.6        | 574.3             | 556.6           | 17.7        | 570.8             | 535.7           | 35.1        |
| Changes in body composition                                                                                                                                                                                                                   | 504               | 473.6           | 30.4        | 557.6             | 554.6           | 3           | 620.6             | 584.3           | 36.3        |
| Weight loss/wasting                                                                                                                                                                                                                           | 402.6             | 377.4           | 25.2        | 389               | 393.9           | -4.9        | 434.2             | 408.1           | 26.1        |
| Hair loss/changes                                                                                                                                                                                                                             | 358.9             | 335.1           | 23.8        | 344.3             | 343.4           | 0.9         | 313.1             | 309.3           | 3.8         |

Bayesian information criterion (BIC) is a criterion for model selection and the model with the lowest BIC is preferred.

**Electronic Supplementary Materials Table 1b: Unadjusted and Adjusted Associations between Treatment and Bothersome Symptoms at Weeks 4, 12 and 48 in Study GS-US-380-1844 (HIV-1 Suppressed)**

| Symptom Description<br>OR (95% CI), p-value | Week 4                  |                                           | Week 12                 |                                          | Week 48                 |                                             |
|---------------------------------------------|-------------------------|-------------------------------------------|-------------------------|------------------------------------------|-------------------------|---------------------------------------------|
|                                             | Unadjusted              | Adjusted                                  | Unadjusted              | Adjusted                                 | Unadjusted              | Adjusted                                    |
| <b>Fatigue/loss of energy</b>               | 0.80 (0.56-1.14), 0.21  | 0.65 (0.43-0.99), 0.045 <sup>a,g</sup>    | 0.97 (0.69-1.37), 0.86  | 0.86 (0.58-1.28), 0.47 <sup>a,c,g</sup>  | 0.85 (0.60-1.21), 0.37  | 0.71 (0.47-1.07), 0.099 <sup>a,g</sup>      |
| Fevers/chills/sweats                        | 1.50 (0.88-2.58), 0.14  | 1.41 (0.76-2.59), 0.27 <sup>a,g</sup>     | 1.02 (0.64-1.64), 0.93  | 0.91 (0.55-1.50), 0.71 <sup>a</sup>      | 0.89 (0.52-1.53), 0.67  | 0.71 (0.39-1.27), 0.25 <sup>a</sup>         |
| <b>Dizzy/lightheadedness</b>                | 0.69 (0.41-1.15), 0.15  | 0.52 (0.29-0.95), 0.033 <sup>a,g</sup>    | 0.87 (0.55-1.38), 0.54  | 0.69 (0.41-1.17), 0.17 <sup>a,e</sup>    | 0.82 (0.49-1.35), 0.43  | 0.59 (0.32-1.09), 0.091 <sup>a,c</sup>      |
| <b>Pain/numbness/tingling in hands/feet</b> | 0.85 (0.56-1.29), 0.44  | 0.63 (0.38-1.05), 0.077 <sup>a,f</sup>    | 0.84 (0.56-1.26), 0.41  | 0.70 (0.44-1.12), 0.13 <sup>a,f</sup>    | 0.80 (0.54-1.19), 0.27  | 0.60 (0.37-0.96), 0.033 <sup>a,c,f,h</sup>  |
| Trouble remembering                         | 1.36 (0.89-2.08), 0.16  | 1.22 (0.73-2.05), 0.44 <sup>a,e</sup>     | 0.86 (0.58-1.27), 0.46  | 0.69 (0.43-1.10), 0.12 <sup>a,e</sup>    | 1.06 (0.71-1.59), 0.76  | 0.93 (0.59-1.46), 0.74 <sup>a,e</sup>       |
| <b>Nausea/vomiting</b>                      | 0.85 (0.44-1.63), 0.62  | 0.62 (0.29-1.29), 0.20 <sup>a,f</sup>     | 0.48 (0.23-1.00), 0.051 | 0.41 (0.18-0.93), 0.032 <sup>a</sup>     | 0.50 (0.24-1.03), 0.058 | 0.32 (0.14-0.74), 0.008 <sup>a</sup>        |
| Diarrhea/loose bowels                       | 0.87 (0.56-1.38), 0.56  | 0.78 (0.47-1.27), 0.31 <sup>a,c</sup>     | 0.97 (0.61-1.52), 0.88  | 0.96 (0.59-1.56), 0.87 <sup>e</sup>      | 0.82 (0.49-1.37), 0.45  | 0.70 (0.40-1.22), 0.21 <sup>a,g,h</sup>     |
| <b>Sad/down/depressed</b>                   | 0.82 (0.54-1.23), 0.33  | 0.57 (0.34-0.96), 0.034 <sup>a,e,g</sup>  | 0.84 (0.57-1.24), 0.37  | 0.62 (0.38-1.01), 0.056 <sup>a,e,g</sup> | 0.67 (0.45-0.98), 0.040 | 0.43 (0.27-0.70), <0.001 <sup>a,e,g,h</sup> |
| <b>Nervous/anxious</b>                      | 0.83 (0.55-1.27), 0.39  | 0.55 (0.32-0.96), 0.035 <sup>a,e,g</sup>  | 0.75 (0.50-1.12), 0.17  | 0.58 (0.36-0.94), 0.027 <sup>a,e,g</sup> | 0.76 (0.52-1.13), 0.17  | 0.58 (0.36-0.92), 0.021 <sup>e,g,h</sup>    |
| <b>Difficulty sleeping</b>                  | 0.95 (0.67-1.35), 0.77  | 0.80 (0.53-1.18), 0.26 <sup>a,g</sup>     | 0.72 (0.51-1.02), 0.066 | 0.56 (0.37-0.84), 0.005 <sup>a,e,g</sup> | 0.86 (0.60-1.23), 0.41  | 0.71 (0.47-1.06), 0.096 <sup>a,e,g,h</sup>  |
| Skin problems/rash/itching                  | 1.00 (0.63-1.60), 1.00  | 0.81 (0.48-1.37), 0.43 <sup>a</sup>       | 0.84 (0.55-1.29), 0.44  | 0.72 (0.46-1.14), 0.16 <sup>a</sup>      | 1.06 (0.70-1.60), 0.77  | 0.97 (0.62-1.51), 0.88 <sup>a</sup>         |
| Coughing/trouble breathing                  | 1.06 (0.65-1.74), 0.80  | 0.98 (0.56-1.69), 0.93 <sup>a,g</sup>     | 1.18 (0.71-1.94), 0.53  | 1.08 (0.62-1.87), 0.78 <sup>a,c,e</sup>  | 0.87 (0.55-1.38), 0.56  | 0.78 (0.47-1.30), 0.35 <sup>a,e,g</sup>     |
| Headaches                                   | 1.02 (0.66-1.58), 0.91  | 0.94 (0.57-1.54), 0.79 <sup>a,b,c</sup>   | 0.93 (0.60-1.44), 0.75  | 0.81 (0.50-1.32), 0.39 <sup>a,f</sup>    | 1.11 (0.71-1.73), 0.66  | 0.96 (0.58-1.59), 0.87 <sup>a,c,f</sup>     |
| <b>Loss of appetite</b>                     | 0.78 (0.42-1.45), 0.43  | 0.59 (0.28-1.25), 0.17 <sup>a</sup>       | 0.47 (0.24-0.89), 0.020 | 0.26 (0.12-0.59), 0.001 <sup>a</sup>     | 0.76 (0.39-1.46), 0.41  | 0.59 (0.27-1.29), 0.18 <sup>a,e</sup>       |
| <b>Bloating/pain/gas in stomach</b>         | 0.81 (0.55-1.21), 0.31  | 0.70 (0.44-1.10), 0.12 <sup>a,h</sup>     | 0.74 (0.49-1.13), 0.17  | 0.62 (0.39-1.00), 0.049 <sup>a</sup>     | 1.00 (0.65-1.53), 0.98  | 0.89 (0.54-1.45), 0.64 <sup>a,h</sup>       |
| Muscle aches/joint pain                     | 1.00 (0.67-1.48), 1.00  | 0.84 (0.50-1.40), 0.50 <sup>a,f,g</sup>   | 1.07 (0.74-1.55), 0.71  | 0.99 (0.65-1.51), 0.95 <sup>a,b,f</sup>  | 1.17 (0.80-1.73), 0.42  | 1.04 (0.67-1.64), 0.85 <sup>a,c,f</sup>     |
| Problems with sex                           | 1.22 (0.77-1.94), 0.40  | 1.14 (0.68-1.91), 0.63 <sup>a,c</sup>     | 0.83 (0.55-1.27), 0.39  | 0.75 (0.47-1.18), 0.21 <sup>a,c,g</sup>  | 0.93 (0.61-1.41), 0.73  | 0.89 (0.57-1.40), 0.62 <sup>a,c,h</sup>     |
| Changes in body composition                 | 1.07 (0.70-1.63), 0.76  | 0.89 (0.54-1.47), 0.65 <sup>a,b,g,h</sup> | 1.00 (0.68-1.49), 0.98  | 0.88 (0.56-1.37), 0.57 <sup>a,b</sup>    | 1.43 (0.96-2.12), 0.077 | 1.31 (0.85-2.03), 0.23 <sup>a,f,g,h</sup>   |
| Weight loss/wasting                         | 1.27 (0.64-2.50), 0.49  | 1.13 (0.53-2.40), 0.76 <sup>a,g</sup>     | 1.27 (0.73-2.21), 0.40  | 1.15 (0.64-2.05), 0.64 <sup>a</sup>      | 1.72 (0.92-3.22), 0.092 | 1.44 (0.73-2.83), 0.30 <sup>a,g</sup>       |
| <b>Hair loss/changes</b>                    | 2.44 (1.10-5.43), 0.029 | 2.43 (1.03-5.71), 0.042 <sup>a,c,d</sup>  | 0.65 (0.31-1.38), 0.26  | 0.54 (0.24-1.19), 0.13 <sup>a,c,d</sup>  | 1.04 (0.58-1.88), 0.89  | 0.82 (0.43-1.56), 0.54 <sup>a,c</sup>       |

Adjusted logistic regression model includes treatment as the independent variable and the bothersome HIVSI item as the dependent variable, adjusted for Baseline HIVSI count, age, sex, Baseline VACS Index, serious mental illness, Baseline SF-36 PCS, Baseline SF-36 MCS, and Years since HIV diagnosis.

P-value is for treatment effect; bolding indicates significant treatment effect in one or more of the models.

The following covariates were statistically significant (p<0.05) in the model: <sup>a</sup>Baseline HIVSI count; <sup>b</sup>Age; <sup>c</sup>Sex; <sup>d</sup>Baseline VACS Index; <sup>e</sup>Serious mental illness; <sup>f</sup>Baseline SF-36 PCS; <sup>g</sup>Baseline SF-36 MCS; <sup>h</sup>Years since HIV diagnosis.

An odds ratio (OR) < 1 represents less bothersome symptom for B/F/TAF

| <b>Electronic Supplementary Materials Table 1b-2: Bayesian information criterion (BIC) for Unadjusted and Adjusted Associations between Treatment and Bothersome Symptoms at Weeks 4, 12 and 48 in Study GS-US-380-1844 (HIV-1 Suppressed)</b> |                   |                 |             |                   |                 |             |                   |                 |             |
|------------------------------------------------------------------------------------------------------------------------------------------------------------------------------------------------------------------------------------------------|-------------------|-----------------|-------------|-------------------|-----------------|-------------|-------------------|-----------------|-------------|
| <b>Symptom Description, BIC</b>                                                                                                                                                                                                                | <b>Week 4</b>     |                 |             | <b>Week 12</b>    |                 |             | <b>Week 48</b>    |                 |             |
|                                                                                                                                                                                                                                                | <b>Unadjusted</b> | <b>Adjusted</b> | <b>Diff</b> | <b>Unadjusted</b> | <b>Adjusted</b> | <b>Diff</b> | <b>Unadjusted</b> | <b>Adjusted</b> | <b>Diff</b> |
| Fatigue/loss of energy                                                                                                                                                                                                                         | 723               | 611             | 112         | 737.2             | 654.4           | 82.8        | 709.8             | 623.9           | 85.9        |
| Fevers/chills/sweats                                                                                                                                                                                                                           | 396               | 363.5           | 32.5        | 473.6             | 471.7           | 1.9         | 382.8             | 383.9           | -1.1        |
| Dizzy/lightheadedness                                                                                                                                                                                                                          | 420.8             | 380.4           | 40.4        | 487.5             | 447.1           | 40.4        | 425.9             | 362.4           | 63.5        |
| Pain/numbness/tingling in hands/feet                                                                                                                                                                                                           | 558.8             | 471.7           | 87.1        | 590               | 518.5           | 71.5        | 595.6             | 520.1           | 75.5        |
| Trouble remembering                                                                                                                                                                                                                            | 551.2             | 451.1           | 100.1       | 618.1             | 520.8           | 97.3        | 597.2             | 542.3           | 54.9        |
| Nausea/vomiting                                                                                                                                                                                                                                | 295.4             | 280             | 15.4        | 258.9             | 263.7           | -4.8        | 266.9             | 255.1           | 11.8        |
| Diarrhea/loose bowels                                                                                                                                                                                                                          | 502.8             | 487             | 15.8        | 501               | 499.1           | 1.9         | 418.4             | 411.5           | 6.9         |
| Sad/down/depressed                                                                                                                                                                                                                             | 591               | 461             | 130         | 627.1             | 497             | 130.1       | 626.4             | 514.1           | 112.3       |
| Nervous/anxious                                                                                                                                                                                                                                | 561.1             | 420.9           | 140.2       | 601.8             | 500.6           | 101.2       | 619.2             | 524.4           | 94.8        |
| Difficulty sleeping                                                                                                                                                                                                                            | 726.7             | 662.4           | 64.3        | 726.7             | 646             | 80.7        | 691.4             | 627.2           | 64.2        |
| Skin problems/rash/itching                                                                                                                                                                                                                     | 479.1             | 445.3           | 33.8        | 549.6             | 540.4           | 9.2         | 572.5             | 550.9           | 21.6        |
| Coughing/trouble breathing                                                                                                                                                                                                                     | 449.3             | 412.9           | 36.4        | 436.5             | 414.9           | 21.6        | 491.2             | 457.7           | 33.5        |
| Headaches                                                                                                                                                                                                                                      | 534.3             | 471.5           | 62.8        | 533               | 490.4           | 42.6        | 501.2             | 459.8           | 41.4        |
| Loss of appetite                                                                                                                                                                                                                               | 315               | 268.6           | 46.4        | 318.9             | 267.6           | 51.3        | 290.1             | 253.1           | 37          |
| Bloating/pain/gas in stomach                                                                                                                                                                                                                   | 607.7             | 543.8           | 63.9        | 561               | 518.1           | 42.9        | 530.4             | 480.6           | 49.8        |
| Muscle aches/joint pain                                                                                                                                                                                                                        | 613.7             | 455.4           | 158.3       | 682.1             | 596.3           | 85.8        | 624.1             | 540.6           | 83.5        |
| Problems with sex                                                                                                                                                                                                                              | 487.8             | 446.9           | 40.9        | 558.5             | 533.7           | 24.8        | 556               | 537             | 19          |
| Changes in body composition                                                                                                                                                                                                                    | 558.4             | 463.2           | 95.2        | 607.2             | 555.4           | 51.8        | 608.2             | 563.2           | 45          |
| Weight loss/wasting                                                                                                                                                                                                                            | 279.1             | 268.7           | 10.4        | 374.7             | 392.9           | -18.2       | 317.5             | 314.1           | 3.4         |
| Hair loss/changes                                                                                                                                                                                                                              | 241.2             | 246.9           | -5.7        | 244.7             | 262.3           | -17.6       | 339               | 336.7           | 2.3         |

Bayesian information criterion (BIC) is a criterion for model selection and the model with the lowest BIC is preferred.

**Electronic Supplementary Materials Table 2a: Longitudinal Models for HIVSI Bothersome Symptoms in Study GS-US-380-1489 (Treatment-Naïve)**

|                                                | Fatigue/loss of energy         | Fevers/chills/sweats           | Dizzy/lightheadedness         | Pain/numbness/tingling in hands/feet | Trouble remembering            |
|------------------------------------------------|--------------------------------|--------------------------------|-------------------------------|--------------------------------------|--------------------------------|
| Treatment (B/F/TAF vs. ABC/DTG/3TC)            | -0.648 (-1.100,-0.196); 0.005  | -0.123 (-0.963,0.716); 0.77    | -0.797 (-1.633,0.038); 0.061  | -0.592 (-1.495,0.312); 0.20          | 0.025 (-0.845,0.894); 0.96     |
| Time                                           | -0.004 (-0.014,0.005); 0.39    | -0.070 (-0.102,-0.037); <0.001 | -0.051 (-0.100,-0.001); 0.045 | -0.049 (-0.081,-0.016); 0.003        | -0.050 (-0.080,-0.020); <0.001 |
| Time x Treatment                               | -0.001 (-0.014,0.013); 0.89    | -0.003 (-0.038,0.032); 0.88    | -0.021 (-0.054,0.013); 0.23   | 0.007 (-0.022,0.036); 0.65           | -0.006 (-0.033,0.021); 0.64    |
| Baseline HIVSI Bothersome Symptom Count        | 0.129 (0.063,0.195); <0.001    | 0.182 (0.054,0.311); 0.006     | 0.103 (-0.023,0.230); 0.11    | 0.147 (0.020,0.275); 0.024           | 0.252 (0.108,0.396); <0.001    |
| Baseline HIVSI Bothersome Symptom (Yes vs. No) | 0.834 (0.409,1.258); <0.001    | 2.739 (1.769,3.708); <0.001    | 3.022 (1.394,4.651); <0.001   | 4.290 (2.582,5.997); <0.001          | 3.537 (1.584,5.490); <0.001    |
| Age                                            | 0.012 (-0.006,0.030); 0.18     | 0.004 (-0.032,0.039); 0.83     | 0.000 (-0.032,0.032); 1.00    | 0.020 (-0.014,0.055); 0.25           | -0.013 (-0.051,0.025); 0.51    |
| Sex (Female vs. Male)                          | 0.194 (-0.378,0.765); 0.51     | 0.827 (-0.385,2.039); 0.18     | -0.194 (-1.260,0.872); 0.72   | -0.012 (-1.347,1.324); 0.99          | -0.254 (-1.632,1.125); 0.72    |
| Baseline VACS Index                            | -0.014 (-0.029,0.000); 0.052   | -0.028 (-0.068,0.011); 0.16    | -0.001 (-0.035,0.032); 0.93   | 0.001 (-0.032,0.034); 0.97           | 0.033 (0.000,0.066); 0.052     |
| Serious mental illness (Yes vs. No)            | 0.373 (-0.017,0.763); 0.061    | 0.095 (-0.700,0.890); 0.81     | -0.123 (-0.897,0.651); 0.76   | 0.007 (-0.831,0.846); 0.99           | 0.781 (-0.074,1.636); 0.073    |
| Baseline SF-36 PCS                             | -0.073 (-0.105,-0.041); <0.001 | -0.083 (-0.159,-0.007); 0.032  | -0.089 (-0.156,-0.021); 0.010 | -0.107 (-0.176,-0.038); 0.002        | -0.068 (-0.144,0.009); 0.083   |
| Baseline SF-36 MCS                             | -0.038 (-0.056,-0.019); <0.001 | -0.026 (-0.063,0.011); 0.17    | -0.055 (-0.095,-0.015); 0.007 | -0.016 (-0.058,0.026); 0.46          | -0.045 (-0.087,-0.003); 0.037  |
| Unadjusted/adjusted BIC                        | 2249.38/2010.69                | 1504.52/1337.49                | 1609.45/1422.98               | 1518.66/1314.63                      | 1664.22/1434.56                |

(cont.)

|                                                | Nausea/vomiting*               | Diarrhea/loose bowels          | Sad/down/depressed             | Nervous/anxious                | Difficulty sleeping           |
|------------------------------------------------|--------------------------------|--------------------------------|--------------------------------|--------------------------------|-------------------------------|
| Treatment (B/F/TAF vs. ABC/DTG/3TC)            | -1.520 (-2.344,-0.695); <0.001 | -0.203 (-0.782,0.375); 0.49    | -0.530 (-1.431,0.372); 0.25    | -0.408 (-0.897,0.081); 0.10    | -0.368 (-0.827,0.091); 0.12   |
| Time                                           | -0.117 (-0.168,-0.067); <0.001 | -0.080 (-0.100,-0.060); <0.001 | -0.039 (-0.063,-0.015); 0.001  | -0.006 (-0.019,0.008); 0.41    | -0.002 (-0.017,0.012); 0.75   |
| Time x Treatment                               | 0.026 (-0.027,0.078); 0.34     | -0.012 (-0.038,0.014); 0.37    | -0.010 (-0.043,0.023); 0.54    | 0.000 (-0.016,0.015); 0.95     | -0.007 (-0.023,0.009); 0.41   |
| Baseline HIVSI Bothersome Symptom Count        | 0.022 (-0.082,0.126); 0.68     | 0.029 (-0.051,0.109); 0.48     | 0.221 (0.075,0.367); 0.003     | 0.181 (0.108,0.255); <0.001    | 0.129 (0.052,0.206); 0.001    |
| Baseline HIVSI Bothersome Symptom (Yes vs. No) | 1.929 (-0.376,4.234); 0.10     | 2.638 (1.580,3.697); <0.001    | 2.627 (0.991,4.263); 0.002     | 1.465 (0.904,2.026); <0.001    | 1.518 (0.950,2.085); <0.001   |
| Age                                            | -0.053 (-0.084,-0.021); 0.001  | -0.017 (-0.040,0.006); 0.14    | -0.011 (-0.050,0.027); 0.56    | -0.001 (-0.022,0.020); 0.93    | 0.005 (-0.014,0.025); 0.59    |
| Sex (Female vs. Male)                          | 0.363 (-0.935,1.661); 0.58     | -0.488 (-1.287,0.311); 0.23    | 0.172 (-1.052,1.396); 0.78     | 0.153 (-0.539,0.846); 0.66     | 0.371 (-0.226,0.968); 0.22    |
| Baseline VACS Index                            | -0.006 (-0.036,0.023); 0.67    | 0.006 (-0.013,0.025); 0.52     | -0.015 (-0.047,0.017); 0.36    | -0.015 (-0.033,0.003); 0.094   | -0.009 (-0.025,0.006); 0.23   |
| Serious mental illness (Yes vs. No)            | 0.267 (-0.499,1.033); 0.49     | 0.321 (-0.240,0.882); 0.26     | 1.566 (0.554,2.579); 0.002     | 0.886 (0.433,1.340); <0.001    | 0.469 (0.040,0.898); 0.032    |
| Baseline SF-36 PCS                             | -0.049 (-0.106,0.009); 0.096   | -0.049 (-0.095,-0.003); 0.037  | -0.078 (-0.138,-0.018); 0.010  | -0.021 (-0.055,0.014); 0.24    | -0.045 (-0.083,-0.007); 0.020 |
| Baseline SF-36 MCS                             | -0.042 (-0.075,-0.008); 0.015  | -0.024 (-0.050,0.001); 0.056   | -0.143 (-0.210,-0.076); <0.001 | -0.044 (-0.066,-0.023); <0.001 | -0.021 (-0.042,0.000); 0.051  |
| Unadjusted/adjusted BIC                        | 1348.05/1278.04                | 1570.26/1433.84                | 2035.33/1646.64                | 1999.31/1675.05                | 2144.98/1934.77               |

(cont.)

|                                                | Skin problems/rash/itching     | Coughing/trouble breathing     | Headaches                      | Loss of appetite               | Bloating/pain/gas in stomach   |
|------------------------------------------------|--------------------------------|--------------------------------|--------------------------------|--------------------------------|--------------------------------|
| Treatment (B/F/TAF vs. ABC/DTG/3TC)            | -0.705 (-1.541,0.132); 0.099   | 0.149 (-0.716,1.013); 0.74     | 0.081 (-0.506,0.667); 0.79     | -1.320 (-2.483,-0.157); 0.026  | 0.285 (-0.447,1.016); 0.45     |
| Time                                           | -0.060 (-0.087,-0.034); <0.001 | -0.060 (-0.094,-0.025); <0.001 | -0.079 (-0.103,-0.055); <0.001 | -0.073 (-0.117,-0.030); 0.001  | -0.059 (-0.083,-0.035); <0.001 |
| Time x Treatment                               | 0.009 (-0.021,0.038); 0.56     | -0.004 (-0.038,0.029); 0.80    | -0.036 (-0.062,-0.009); 0.010  | -0.021 (-0.071,0.029); 0.42    | -0.033 (-0.062,-0.005); 0.023  |
| Baseline HIVSI Bothersome Symptom Count        | 0.194 (0.063,0.325); 0.004     | 0.128 (0.002,0.253); 0.046     | 0.150 (0.054,0.245); 0.002     | 0.214 (0.062,0.367); 0.006     | 0.127 (0.007,0.246); 0.037     |
| Baseline HIVSI Bothersome Symptom (Yes vs. No) | 2.550 (1.430,3.670); <0.001    | 3.325 (1.147,5.503); 0.003     | 1.797 (0.750,2.844); <0.001    | 2.689 (0.946,4.431); 0.003     | 2.981 (1.055,4.907); 0.002     |
| Age                                            | -0.018 (-0.054,0.017); 0.31    | 0.035 (-0.003,0.072); 0.068    | -0.024 (-0.050,0.002); 0.074   | -0.104 (-0.165,-0.044); <0.001 | -0.015 (-0.048,0.019); 0.39    |
| Sex (Female vs. Male)                          | 0.440 (-0.810,1.690); 0.49     | 0.605 (-0.434,1.643); 0.25     | 0.803 (-0.079,1.686); 0.074    | -0.016 (-1.635,1.602); 0.98    | 0.013 (-1.192,1.219); 0.98     |
| Baseline VACS Index                            | 0.018 (-0.014,0.051); 0.26     | -0.020 (-0.056,0.016); 0.28    | -0.011 (-0.033,0.011); 0.33    | 0.017 (-0.037,0.072); 0.53     | 0.001 (-0.027,0.029); 0.95     |
| Serious mental illness (Yes vs. No)            | 0.111 (-0.629,0.850); 0.77     | -0.425 (-1.346,0.496); 0.37    | -0.060 (-0.649,0.529); 0.84    | 0.416 (-0.593,1.425); 0.42     | -0.381 (-1.145,0.382); 0.33    |
| Baseline SF-36 PCS                             | -0.099 (-0.169,-0.028); 0.006  | -0.107 (-0.167,-0.047); <0.001 | -0.041 (-0.084,0.002); 0.063   | -0.213 (-0.319,-0.108); <0.001 | -0.085 (-0.150,-0.019); 0.011  |
| Baseline SF-36 MCS                             | -0.033 (-0.070,0.004); 0.083   | -0.032 (-0.068,0.005); 0.091   | 0.003 (-0.022,0.028); 0.83     | -0.037 (-0.083,0.010); 0.12    | -0.038 (-0.071,-0.006); 0.019  |
| Unadjusted/adjusted BIC                        | 1780.05/1608.28                | 1322.62/1152.49                | 1711.73/1569.23                | 1173.84/1021.75                | 1803.08/1646.55                |

(cont.)

|                                                | Muscle aches/joint pain       | Problems with sex              | Changes in body composition   | Weight loss/wasting           | Hair loss/changes             |
|------------------------------------------------|-------------------------------|--------------------------------|-------------------------------|-------------------------------|-------------------------------|
| Treatment (B/F/TAF vs. ABC/DTG/3TC)            | 0.077 (-0.755,0.909); 0.86    | 0.399 (-0.457,1.254); 0.36     | 0.817 (-0.027,1.661); 0.058   | -0.701 (-1.607,0.205); 0.13   | -0.662 (-1.805,0.480); 0.26   |
| Time                                           | -0.015 (-0.075,0.045); 0.63   | -0.069 (-0.098,-0.040); <0.001 | -0.038 (-0.062,-0.015); 0.001 | -0.048 (-0.091,-0.005); 0.030 | -0.059 (-0.121,0.003); 0.061  |
| Time x Treatment                               | -0.011 (-0.039,0.016); 0.42   | -0.015 (-0.047,0.017); 0.36    | -0.027 (-0.051,-0.003); 0.030 | 0.008 (-0.020,0.036); 0.59    | -0.010 (-0.063,0.043); 0.70   |
| Baseline HIVSI Bothersome Symptom Count        | 0.134 (0.019,0.248); 0.023    | 0.086 (-0.029,0.200); 0.14     | 0.087 (-0.016,0.189); 0.097   | 0.128 (0.023,0.233); 0.017    | 0.068 (-0.058,0.194); 0.29    |
| Baseline HIVSI Bothersome Symptom (Yes vs. No) | 2.795 (1.541,4.048); <0.001   | 3.965 (2.923,5.006); <0.001    | 4.734 (2.825,6.642); <0.001   | 1.290 (-0.237,2.818); 0.097   | 4.242 (0.819,7.665); 0.015    |
| Age                                            | 0.037 (0.001,0.074); 0.045    | -0.007 (-0.045,0.030); 0.70    | 0.013 (-0.024,0.050); 0.50    | -0.042 (-0.079,-0.006); 0.023 | -0.072 (-0.128,-0.017); 0.011 |
| Sex (Female vs. Male)                          | 1.312 (0.020,2.605); 0.047    | -0.441 (-1.661,0.779); 0.48    | 0.719 (-0.555,1.993); 0.27    | 0.370 (-0.727,1.466); 0.51    | 0.846 (-0.347,2.039); 0.16    |
| Baseline VACS Index                            | 0.003 (-0.025,0.032); 0.82    | -0.003 (-0.034,0.028); 0.86    | -0.010 (-0.045,0.024); 0.55   | 0.008 (-0.017,0.034); 0.52    | 0.062 (0.012,0.113); 0.016    |
| Serious mental illness (Yes vs. No)            | -0.177 (-0.990,0.636); 0.67   | -0.187 (-1.061,0.687); 0.67    | -0.120 (-0.896,0.657); 0.76   | 0.347 (-0.372,1.067); 0.34    | -0.109 (-1.135,0.917); 0.83   |
| Baseline SF-36 PCS                             | -0.140 (-0.225,-0.055); 0.001 | -0.099 (-0.168,-0.031); 0.004  | -0.074 (-0.136,-0.011); 0.021 | -0.078 (-0.141,-0.015); 0.015 | -0.069 (-0.140,0.002); 0.056  |
| Baseline SF-36 MCS                             | -0.044 (-0.079,-0.008); 0.016 | -0.055 (-0.093,-0.017); 0.004  | -0.012 (-0.044,0.019); 0.45   | 0.000 (-0.034,0.035); 0.98    | -0.013 (-0.057,0.031); 0.56   |
| Unadjusted/adjusted BIC                        | 1747.47/1534.11               | 1549.49/1317.58                | 1469.97/1265.36               | 1030.99/941.73                | 764.97/686.93                 |

Models used an unstructured covariance structure, except those denoted by a \*, which used a variance component structure instead.

A negative coefficient for time suggests the prevalence declines over time, while a negative term for treatment suggests a lower prevalence associated with the switch group. Similarly, a negative interaction term for time and treatment group indicates either a more rapid decline (if the main term for time is negative) or a slower increase in the prevalence of the symptom

**Abbreviations:** ABC/DTG/3TC, Abacavir/Dolutegravir/Lamivudine; B/F/TAF, Bictegravir/Emtricitabine/Tenofovir Alafenamide; BIC, Bayesian information criterion; CI, confidence interval; HIVSI, HIV Symptom Index; SF-36 MCS, Short Form 36 Mental Composite Score; SF-36 PCS, Short Form 36 Physical Composite Score; VACS, Veterans Aging Cohort Study.

**Electronic Supplementary Materials Table 2b: Longitudinal Models for HIVSI Bothersome Symptoms in Study GS-US-380-1844 (HIV-1 Suppressed)**

|                                                | Fatigue/loss of energy*        | Fevers/chills/sweats          | Dizzy/lightheadedness*        | Pain/numbness/tingling in hands/feet | Trouble remembering         |
|------------------------------------------------|--------------------------------|-------------------------------|-------------------------------|--------------------------------------|-----------------------------|
| Treatment (B/F/TAF vs. ABC/DTG/3TC)            | -0.387 (-0.839,0.065); 0.093   | 0.294 (-0.534,1.122); 0.49    | -0.745 (-1.368,-0.122); 0.019 | -0.639 (-1.673,0.396); 0.23          | -0.018 (-1.264,1.228); 0.98 |
| Time                                           | 0.005 (-0.004,0.015); 0.28     | -0.041 (-0.095,0.013); 0.13   | -0.002 (-0.014,0.009); 0.70   | -0.020 (-0.063,0.023); 0.36          | -0.008 (-0.040,0.024); 0.64 |
| Time x Treatment                               | -0.001 (-0.015,0.013); 0.86    | -0.026 (-0.058,0.006); 0.12   | 0.004 (-0.015,0.024); 0.64    | -0.005 (-0.035,0.025); 0.76          | -0.008 (-0.040,0.024); 0.63 |
| Baseline HIVSI Bothersome Symptom Count        | 0.077 (0.007,0.147); 0.032     | 0.102 (-0.029,0.233); 0.13    | 0.144 (0.066,0.223); <0.001   | 0.132 (-0.008,0.273); 0.065          | 0.224 (0.023,0.424); 0.029  |
| Baseline HIVSI Bothersome Symptom (Yes vs. No) | 1.719 (1.262,2.175); <0.001    | 3.556 (1.446,5.667); <0.001   | 1.686 (1.005,2.367); <0.001   | 5.462 (2.745,8.180); <0.001          | 9.947 (2.383,17.512); 0.010 |
| Age                                            | -0.016 (-0.041,0.008); 0.18    | 0.015 (-0.029,0.059); 0.50    | -0.007 (-0.036,0.022); 0.64   | -0.003 (-0.052,0.046); 0.90          | 0.051 (-0.007,0.109); 0.084 |
| Sex (Female vs. Male)                          | -0.474 (-1.018,0.070); 0.087   | 0.526 (-0.569,1.621); 0.35    | 0.483 (-0.134,1.100); 0.12    | 0.198 (-1.343,1.739); 0.80           | 0.037 (-1.258,1.332); 0.96  |
| Baseline VACS Index                            | 0.007 (-0.016,0.029); 0.57     | -0.037 (-0.088,0.015); 0.16   | 0.006 (-0.023,0.034); 0.69    | 0.010 (-0.034,0.054); 0.65           | -0.024 (-0.078,0.031); 0.40 |
| Serious mental illness (Yes vs. No)            | 0.371 (-0.015,0.757); 0.059    | 0.314 (-0.361,0.988); 0.36    | 0.439 (-0.043,0.921); 0.074   | 0.709 (-0.080,1.499); 0.078          | 1.116 (0.257,1.974); 0.011  |
| Baseline SF-36 PCS                             | -0.019 (-0.046,0.008); 0.18    | -0.016 (-0.073,0.040); 0.57   | -0.005 (-0.038,0.027); 0.74   | -0.114 (-0.187,-0.040); 0.003        | -0.017 (-0.079,0.046); 0.60 |
| Baseline SF-36 MCS                             | -0.071 (-0.094,-0.047); <0.001 | -0.059 (-0.102,-0.016); 0.008 | -0.038 (-0.064,-0.011); 0.005 | -0.032 (-0.086,0.023); 0.25          | -0.040 (-0.101,0.021); 0.20 |
| Years Since HIV Diagnosis                      | 0.014 (-0.013,0.041); 0.30     | 0.018 (-0.029,0.064); 0.46    | 0.017 (-0.016,0.050); 0.32    | 0.025 (-0.034,0.085); 0.41           | 0.000 (-0.062,0.061); 0.99  |
| Unadjusted/adjusted BIC                        | 1947.25/1677.59                | 1117.93/1013.95               | 1178.85/1036.16               | 1477.73/1229.06                      | 1429.71/1130.70             |

(cont.)

|                                                | Nausea/vomiting               | Diarrhea/loose bowels*         | Sad/down/depressed*            | Nervous/anxious*               | Difficulty sleeping*           |
|------------------------------------------------|-------------------------------|--------------------------------|--------------------------------|--------------------------------|--------------------------------|
| Treatment (B/F/TAF vs. ABC/DTG/3TC)            | -0.846 (-1.484,-0.209); 0.009 | -0.245 (-0.905,0.416); 0.47    | -0.581 (-1.155,-0.008); 0.047  | -0.990 (-1.966,-0.015); 0.047  | -0.516 (-0.996,-0.036); 0.035  |
| Time                                           | 0.024 (0.012,0.037); <0.001   | -0.077 (-0.106,-0.049); <0.001 | 0.016 (0.002,0.030); 0.029     | -0.022 (-0.049,0.004); 0.099   | 0.000 (-0.012,0.012); 0.98     |
| Time x Treatment                               | -0.005 (-0.028,0.019); 0.70   | -0.003 (-0.033,0.028); 0.85    | -0.011 (-0.028,0.007); 0.24    | -0.001 (-0.026,0.023); 0.91    | 0.001 (-0.014,0.015); 0.93     |
| Baseline HIVSI Bothersome Symptom Count        | 0.177 (0.073,0.280); <0.001   | -0.032 (-0.134,0.071); 0.55    | 0.072 (-0.005,0.150); 0.068    | 0.135 (-0.023,0.293); 0.094    | 0.083 (0.010,0.157); 0.027     |
| Baseline HIVSI Bothersome Symptom (Yes vs. No) | 1.678 (0.954,2.401); <0.001   | 3.709 (2.262,5.156); <0.001    | 1.595 (0.888,2.301); <0.001    | 3.576 (1.546,5.607); <0.001    | 1.713 (1.178,2.248); <0.001    |
| Age                                            | -0.009 (-0.039,0.022); 0.58   | -0.011 (-0.048,0.026); 0.57    | 0.018 (-0.011,0.046); 0.23     | 0.001 (-0.046,0.047); 0.98     | 0.006 (-0.020,0.033); 0.64     |
| Sex (Female vs. Male)                          | 0.696 (0.028,1.364); 0.041    | -1.768 (-2.873,-0.663); 0.002  | 0.057 (-0.647,0.762); 0.87     | 0.488 (-0.772,1.748); 0.45     | -0.127 (-0.792,0.538); 0.71    |
| Baseline VACS Index                            | -0.017 (-0.046,0.013); 0.26   | -0.011 (-0.052,0.029); 0.59    | -0.017 (-0.045,0.010); 0.22    | -0.031 (-0.081,0.019); 0.23    | -0.014 (-0.039,0.010); 0.25    |
| Serious mental illness (Yes vs. No)            | 0.209 (-0.260,0.679); 0.38    | 0.619 (0.042,1.196); 0.036     | 0.999 (0.534,1.465); <0.001    | 1.344 (0.531,2.157); 0.001     | 0.883 (0.462,1.304); <0.001    |
| Baseline SF-36 PCS                             | -0.001 (-0.042,0.039); 0.94   | -0.058 (-0.103,-0.013); 0.012  | -0.029 (-0.063,0.005); 0.095   | -0.013 (-0.073,0.048); 0.68    | -0.014 (-0.044,0.015); 0.33    |
| Baseline SF-36 MCS                             | -0.010 (-0.046,0.025); 0.57   | -0.045 (-0.082,-0.008); 0.018  | -0.100 (-0.131,-0.069); <0.001 | -0.130 (-0.200,-0.060); <0.001 | -0.051 (-0.077,-0.025); <0.001 |
| Years Since HIV Diagnosis                      | -0.029 (-0.065,0.008); 0.12   | 0.003 (-0.038,0.044); 0.89     | 0.017 (-0.014,0.049); 0.27     | 0.008 (-0.050,0.066); 0.79     | 0.021 (-0.008,0.050); 0.16     |
| Unadjusted/adjusted BIC                        | 722.60/710.94                 | 1217.13/1073.23                | 1599.87/1312.86                | 1515.45/1240.54                | 1925.51/1696.95                |



(cont.)

|                                                | Skin problems/rash/itching     | Coughing/trouble breathing     | Headaches                     | Loss of appetite              | Bloating/pain/gas in stomach   |
|------------------------------------------------|--------------------------------|--------------------------------|-------------------------------|-------------------------------|--------------------------------|
| Treatment (B/F/TAF vs. ABC/DTG/3TC)            | -0.840 (-1.784,0.104); 0.081   | 0.024 (-0.909,0.958); 0.96     | -0.378 (-1.246,0.490); 0.39   | -2.121 (-4.010,-0.231); 0.028 | -0.701 (-1.438,0.036); 0.062   |
| Time                                           | -0.061 (-0.089,-0.034); <0.001 | -0.037 (-0.088,0.015); 0.16    | -0.046 (-0.089,-0.003); 0.035 | -0.012 (-0.050,0.025); 0.52   | -0.063 (-0.094,-0.033); <0.001 |
| Time x Treatment                               | 0.013 (-0.015,0.041); 0.36     | -0.006 (-0.037,0.025); 0.70    | 0.005 (-0.026,0.037); 0.74    | 0.004 (-0.063,0.072); 0.91    | 0.015 (-0.010,0.041); 0.24     |
| Baseline HIVSI Bothersome Symptom Count        | 0.263 (0.096,0.429); 0.002     | 0.060 (-0.068,0.189); 0.35     | 0.236 (0.094,0.378); 0.001    | 0.234 (0.025,0.443); 0.029    | 0.117 (-0.015,0.248); 0.082    |
| Baseline HIVSI Bothersome Symptom (Yes vs. No) | 3.976 (2.216,5.736); <0.001    | 3.677 (2.271,5.082); <0.001    | 3.311 (1.365,5.258); <0.001   | 7.504 (3.311,11.697); <0.001  | 3.520 (1.794,5.246); <0.001    |
| Age                                            | 0.033 (-0.010,0.076); 0.13     | 0.015 (-0.027,0.057); 0.48     | -0.033 (-0.078,0.012); 0.15   | 0.017 (-0.062,0.096); 0.67    | -0.018 (-0.055,0.019); 0.33    |
| Sex (Female vs. Male)                          | -0.177 (-1.660,1.307); 0.81    | -1.427 (-2.942,0.089); 0.065   | 1.326 (-0.082,2.734); 0.065   | 0.619 (-1.143,2.381); 0.49    | 0.214 (-0.824,1.252); 0.69     |
| Baseline VACS Index                            | -0.028 (-0.072,0.016); 0.21    | -0.023 (-0.069,0.023); 0.33    | -0.011 (-0.055,0.033); 0.62   | -0.022 (-0.100,0.056); 0.58   | 0.007 (-0.029,0.043); 0.70     |
| Serious mental illness (Yes vs. No)            | 0.769 (0.083,1.456); 0.028     | 1.039 (0.349,1.730); 0.003     | 0.242 (-0.491,0.975); 0.52    | 1.799 (0.127,3.470); 0.035    | -0.102 (-0.718,0.514); 0.75    |
| Baseline SF-36 PCS                             | -0.015 (-0.085,0.055); 0.67    | -0.057 (-0.108,-0.007); 0.027  | -0.083 (-0.141,-0.026); 0.005 | -0.036 (-0.119,0.046); 0.39   | -0.014 (-0.062,0.034); 0.57    |
| Baseline SF-36 MCS                             | -0.002 (-0.055,0.051); 0.94    | -0.083 (-0.126,-0.039); <0.001 | 0.003 (-0.039,0.046); 0.88    | -0.008 (-0.072,0.057); 0.82   | -0.065 (-0.105,-0.025); 0.002  |
| Years Since HIV Diagnosis                      | -0.006 (-0.058,0.046); 0.82    | 0.016 (-0.033,0.066); 0.52     | -0.009 (-0.060,0.042); 0.74   | 0.011 (-0.076,0.098); 0.80    | 0.054 (0.010,0.098); 0.017     |
| Unadjusted/adjusted BIC                        | 1464.75/1248.38                | 1230.49/1065.05                | 1391.50/1215.47               | 625.71/558.28                 | 1493.28/1281.65                |

(cont.)

|                                                | Muscle aches/joint pain     | Problems with sex             | Changes in body composition   | Weight loss/wasting            | Hair loss/changes           |
|------------------------------------------------|-----------------------------|-------------------------------|-------------------------------|--------------------------------|-----------------------------|
| Treatment (B/F/TAF vs. ABC/DTG/3TC)            | -0.203 (-0.972,0.566); 0.60 | 0.519 (-0.426,1.464); 0.28    | -0.753 (-1.892,0.385); 0.19   | -0.215 (-1.215,0.786); 0.67    | 0.441 (-0.659,1.541); 0.43  |
| Time                                           | -0.025 (-0.148,0.097); 0.68 | -0.033 (-0.074,0.009); 0.12   | -0.044 (-0.083,-0.004); 0.030 | -0.074 (-0.116,-0.033); <0.001 | -0.001 (-0.038,0.035); 0.94 |
| Time x Treatment                               | 0.010 (-0.017,0.037); 0.46  | -0.012 (-0.038,0.013); 0.34   | 0.030 (0.000,0.060); 0.054    | 0.018 (-0.020,0.056); 0.36     | -0.026 (-0.060,0.007); 0.13 |
| Baseline HIVSI Bothersome Symptom Count        | 0.169 (-0.043,0.381); 0.12  | -0.023 (-0.160,0.113); 0.74   | 0.120 (-0.050,0.289); 0.17    | 0.086 (-0.042,0.214); 0.19     | 0.105 (-0.014,0.224); 0.083 |
| Baseline HIVSI Bothersome Symptom (Yes vs. No) | 2.086 (-0.606,4.778); 0.13  | 6.115 (3.173,9.057); <0.001   | 6.822 (2.967,10.676); <0.001  | 4.059 (2.260,5.858); <0.001    | 3.074 (1.644,4.505); <0.001 |
| Age                                            | 0.036 (-0.012,0.084); 0.14  | 0.036 (-0.017,0.089); 0.18    | 0.059 (-0.001,0.118); 0.054   | -0.010 (-0.063,0.043); 0.72    | 0.019 (-0.032,0.069); 0.47  |
| Sex (Female vs. Male)                          | 0.873 (-0.264,2.011); 0.13  | -1.214 (-2.661,0.234); 0.10   | 0.468 (-1.147,2.084); 0.57    | 0.046 (-1.333,1.424); 0.95     | 1.659 (0.277,3.041); 0.019  |
| Baseline VACS Index                            | -0.017 (-0.054,0.020); 0.36 | -0.027 (-0.078,0.023); 0.29   | -0.014 (-0.078,0.050); 0.66   | 0.010 (-0.039,0.059); 0.70     | -0.026 (-0.083,0.031); 0.37 |
| Serious mental illness (Yes vs. No)            | 0.178 (-0.458,0.813); 0.58  | 0.885 (0.150,1.620); 0.018    | 0.091 (-0.791,0.973); 0.84    | 0.167 (-0.648,0.982); 0.69     | 0.367 (-0.380,1.114); 0.33  |
| Baseline SF-36 PCS                             | -0.105 (-0.256,0.046); 0.17 | -0.052 (-0.117,0.013); 0.12   | -0.038 (-0.106,0.030); 0.27   | 0.008 (-0.059,0.074); 0.82     | -0.005 (-0.071,0.062); 0.89 |
| Baseline SF-36 MCS                             | -0.046 (-0.113,0.021); 0.18 | -0.063 (-0.114,-0.011); 0.017 | -0.084 (-0.142,-0.027); 0.004 | -0.068 (-0.116,-0.020); 0.006  | -0.001 (-0.047,0.045); 0.96 |
| Years Since HIV Diagnosis                      | 0.028 (-0.028,0.084); 0.32  | 0.037 (-0.020,0.093); 0.20    | 0.052 (-0.009,0.114); 0.096   | 0.012 (-0.042,0.067); 0.66     | -0.020 (-0.083,0.042); 0.52 |
| Unadjusted/adjusted BIC                        | 1673.95/1413.57             | 1322.61/1120.83               | 1496.88/1163.67               | 795.33/740.56                  | 661.30/552.87               |

Models used an unstructured covariance structure, except those denoted by a \*, which used a variance component structure instead.

A negative coefficient for time suggests the prevalence declines over time, while a negative term for treatment suggests a lower prevalence associated with the B/F/TAF group.

**Abbreviations:** ABC/DTG/3TC, Abacavir/Dolutegravir/Lamivudine; B/F/TAF, Bictegravir/Emtricitabine/Tenofovir Alafenamide; BIC, Bayesian information criterion; CI, confidence interval; HIVSI, HIV Symptom Index; SF-36 MCS, Short Form 36 Mental Composite Score; SF-36 PCS, Short Form 36 Physical Composite Score; VACS, Veterans Aging Cohort Study.
